# Supplementary material for: A Genomic Instability Score in Discriminating Nonequivalent Outcomes of BRCA1/2 Mutations and in Predicting Outcomes of Ovarian Cancer Treated with Platinum-Based Chemotherapy
Source: PubMed Central journal article supplement (PMC4249855; doi:10.1371/journal.pone.0113169), 2014-12-01

A

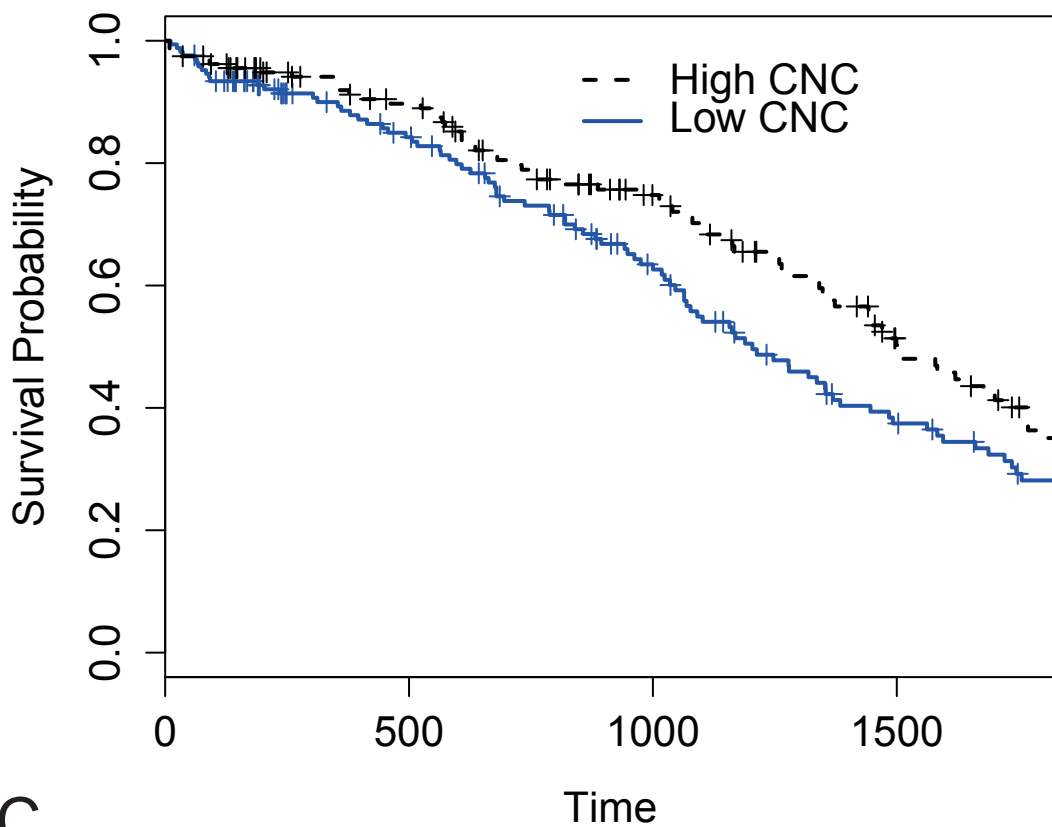

B

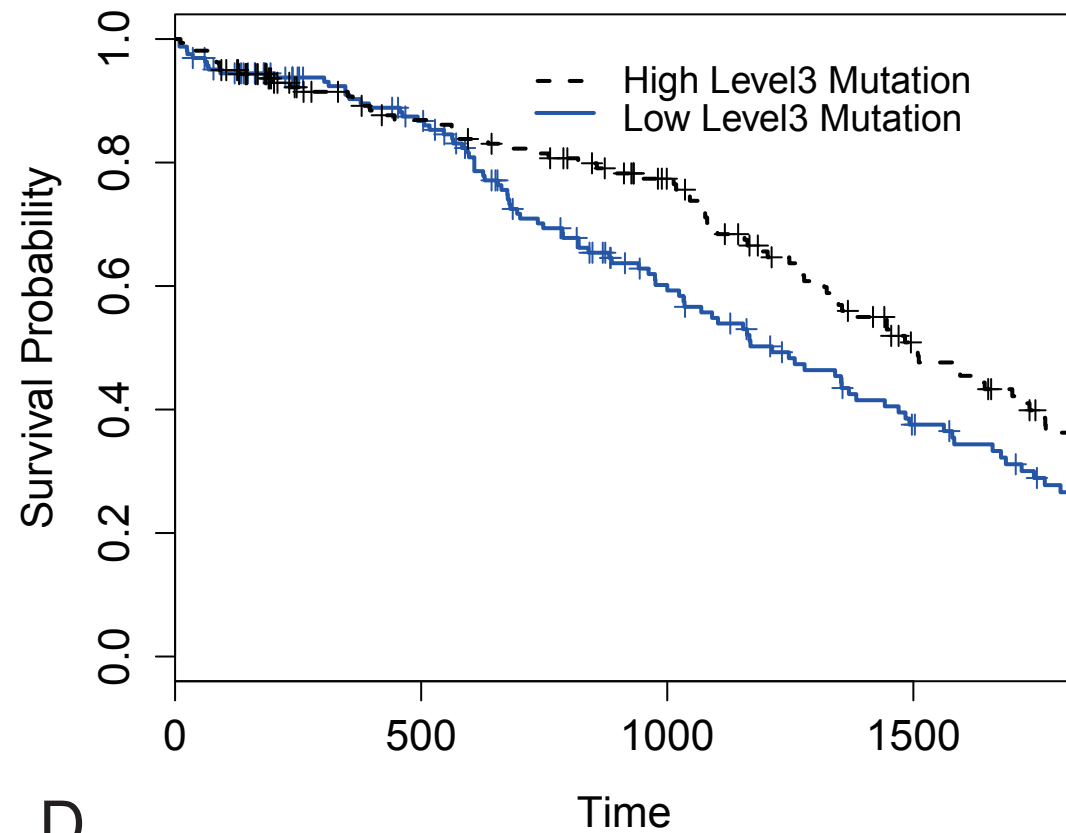

C

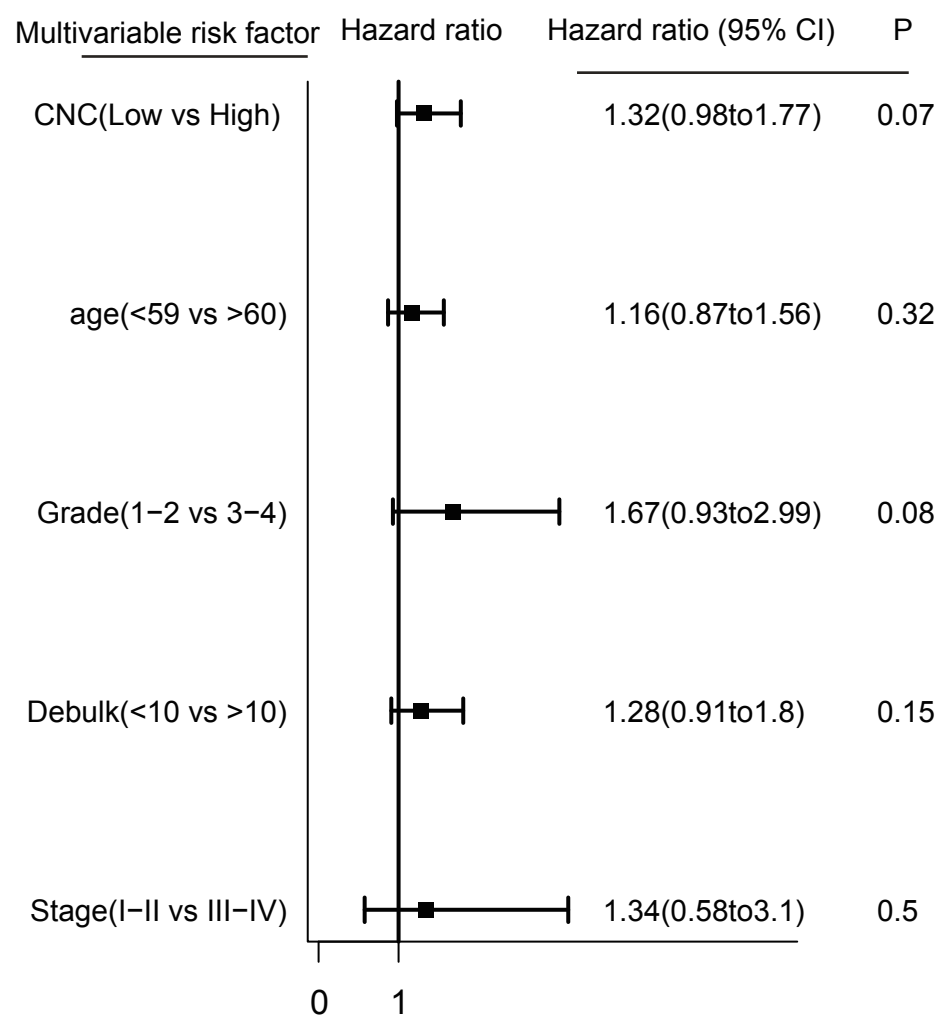

D

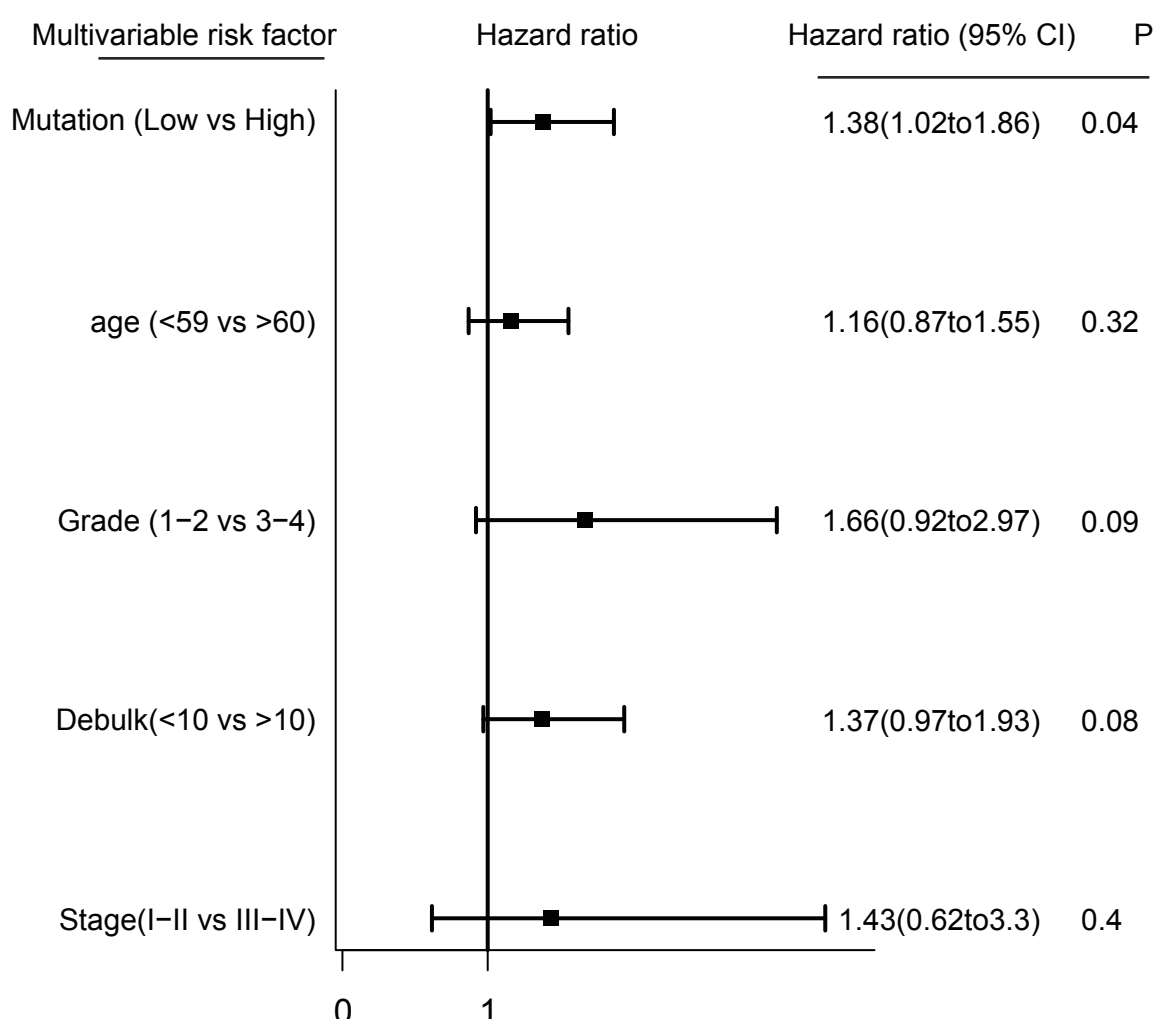

Supplement: pone.0113169.s002.pdf [file pone.0113169.s002.pdf]
